# Supplementary material for: Automated model-predictive design of synthetic promoters to control transcriptional profiles in bacteria
Source: PubMed Central journal article supplement (PMC9440211; doi:10.1038/s41467-022-32829-5), 2022-09-02
Supplement: 41467_2022_32829_MOESM4_ESM.pdf [file 41467_2022_32829_MOESM4_ESM.pdf]

Title: Supplementary Data 1

Description: Sequences, measurements, and LaFleur linear model predictions across all datasets

Title: Supplementary Data 2

Description: Sequences and LaFleur quadratic model predictions across all datasets.

Title: Supplementary Data 3

Description: Lagator et al. extended model predictions and sequences.

Title: Supplementary Data 4

Description: F-tests, model benchmarking, and mono-nt vs. tri-nt model comparison.

Title: Supplementary Data 5

Description: Fitted model slopes and intercepts used for benchmarking.
